# Supplementary material for: Associations between Respiratory Health Outcomes and Coal Mine Fire PM2.5 Smoke Exposure: A Cross-Sectional Study
Source: PubMed Central journal article supplement (PMC6862448; doi:10.3390/ijerph16214262), 2019-11-02
Supplement: ijerph-16-04262-s001.pdf [file ijerph-16-04262-s001.pdf]

## Supplementary Materials

Supplementary Table S1. Imputed observations for self-reported survey variables.

| Predictor Variable            | Complete | No. Imputed | % Imputed | Total |
|-------------------------------|----------|-------------|-----------|-------|
| Age                           | 3090     | 6           | 0.19%     | 3096  |
| Employment                    | 3057     | 39          | 1.26%     | 3096  |
| Education                     | 3055     | 41          | 1.32%     | 3096  |
| Smoking                       | 3063     | 33          | 1.07%     | 3096  |
| Male                          | 3094     | 2           | 0.06%     | 3096  |
| Married                       | 3078     | 18          | 0.58%     | 3096  |
| Wheeze                        | 3089     | 7           | 0.23%     | 3096  |
| Chest tightness               | 3089     | 7           | 0.23%     | 3096  |
| Nocturnal shortness of breath | 3089     | 7           | 0.23%     | 3096  |
| Resting shortness of breath   | 3088     | 8           | 0.26%     | 3096  |
| Current nasal symptoms        | 3088     | 8           | 0.26%     | 3096  |
| Cough                         | 3088     | 8           | 0.26%     | 3096  |
| Phlegm                        | 3088     | 8           | 0.26%     | 3096  |
| Asthma pre 2014               | 3079     | 17          | 0.55%     | 3096  |
| COPD pre 2014                 | 3086     | 10          | 0.32%     | 3096  |
| Asthma since 2014             | 3079     | 17          | 0.55%     | 3096  |
| COPD since 2014               | 3086     | 10          | 0.32%     | 3096  |

Supplementary Table S2. Whole Population - Multivariate model results for associations between respiratory outcomes and mine fire-related PM<sub>2.5</sub> concentrations.

| Outcomes                      | Mean 24-h exposure model<br>(10 µg/m <sup>3</sup> ) |         | Peak 12-h exposure model<br>(100 µg/m <sup>3</sup> ) |         |
|-------------------------------|-----------------------------------------------------|---------|------------------------------------------------------|---------|
|                               | Adj OR (95% CI)                                     | p-value | Adj OR (95% CI)                                      | p-value |
| Current wheeze                | 1.04 (0.96,1.12)                                    | 0.391   | 1.06 (1.02,1.11)                                     | 0.004   |
| Chest tightness               | 1.04 (0.95,1.12)                                    | 0.403   | 1.03 (0.99,1.08)                                     | 0.129   |
| Nocturnal shortness of breath | 1.01 (0.92,1.10)                                    | 0.833   | 1.02 (0.98,1.07)                                     | 0.332   |
| Resting shortness of breath   | 1.02 (0.93,1.11)                                    | 0.704   | 1.03 (0.98,1.08)                                     | 0.237   |
| Current nasal symptoms        | 1.03 (0.95,1.11)                                    | 0.481   | 1.02 (0.98,1.06)                                     | 0.288   |
| Chronic cough                 | 1.13 (1.03,1.23)                                    | 0.007   | 1.07 (1.02,1.12)                                     | 0.004   |
| Chronic Phlegm                | 1.10 (1.00,1.20)                                    | 0.052   | 1.04 (0.99,1.09)                                     | 0.153   |
| Asthma since 2014             | 1.08 (0.85,1.37)                                    | 0.530   | 1.08 (0.93,1.25)                                     | 0.341   |
| COPD since 2014               | 0.84 (0.64,1.10)                                    | 0.197   | 0.96 (0.83,1.11)                                     | 0.573   |

Supplementary Table S3. Sex stratified results for males - Multivariate model results for associations between respiratory outcomes and mine fire-related PM<sub>2.5</sub> concentrations.

| Outcomes                      | Mean 24-h exposure model<br>(10 µg/m <sup>3</sup> ) |         | Peak 12-h exposure model<br>(100 µg/m <sup>3</sup> ) |         |
|-------------------------------|-----------------------------------------------------|---------|------------------------------------------------------|---------|
|                               | Adj OR (95% CI)                                     | p-value | Adj OR (95% CI)                                      | p-value |
| Current wheeze                | 1.11 (0.97,1.26)                                    | 0.120   | 1.10 (1.03,1.17)                                     | 0.004   |
| Chest tightness               | 1.08 (0.96,1.22)                                    | 0.216   | 1.04 (0.98,1.11)                                     | 0.212   |
| Nocturnal shortness of breath | 1.11 (0.98,1.26)                                    | 0.112   | 1.07 (1.00,1.14)                                     | 0.067   |
| Resting shortness of breath   | 1.08 (0.94,1.24)                                    | 0.289   | 1.06 (0.98,1.14)                                     | 0.128   |
| Current nasal symptoms        | 1.03 (0.91,1.15)                                    | 0.660   | 1.02 (0.96,1.08)                                     | 0.573   |
| Chronic cough                 | 1.20 (1.05,1.37)                                    | 0.007   | 1.07 (1.00,1.14)                                     | 0.050   |
| Chronic Phlegm                | 1.13 (0.99,1.28)                                    | 0.064   | 1.04 (0.97,1.11)                                     | 0.285   |
| Asthma since 2014             | 1.58 (1.10,2.29)                                    | 0.014   | 1.43 (1.14,1.78)                                     | 0.002   |
| COPD since 2014               | 0.76 (0.51,1.14)                                    | 0.182   | 0.90 (0.72,1.12)                                     | 0.342   |

Supplementary Table S4. Sex stratified results for females - Multivariate model results for associations between respiratory outcomes and mine fire-related PM<sub>2.5</sub> concentrations.

| Outcomes                      | Mean 24-h exposure model<br>(10 µg/m <sup>3</sup> ) |         | Peak 12-h exposure model<br>(100 µg/m <sup>3</sup> ) |         |
|-------------------------------|-----------------------------------------------------|---------|------------------------------------------------------|---------|
|                               | Adj OR (95% CI)                                     | p-value | Adj OR (95% CI)                                      | p-value |
| Current wheeze                | 0.97 (0.88,1.06)                                    | 0.497   | 1.03 (0.97,1.08)                                     | 0.363   |
| Chest tightness               | 1.00 (0.90,1.10)                                    | 0.937   | 1.03 (0.97,1.09)                                     | 0.374   |
| Nocturnal shortness of breath | 0.93 (0.82,1.04)                                    | 0.199   | 0.98 (0.92,1.05)                                     | 0.609   |
| Resting shortness of breath   | 0.97 (0.87,1.09)                                    | 0.663   | 1.00 (0.94,1.07)                                     | 0.882   |
| Current nasal symptoms        | 1.03 (0.94,1.13)                                    | 0.472   | 1.03 (0.98,1.08)                                     | 0.305   |
| Chronic cough                 | 1.05 (0.94,1.17)                                    | 0.368   | 1.06 (1.00,1.12)                                     | 0.051   |
| Chronic Phlegm                | 1.05 (0.92,1.20)                                    | 0.461   | 1.03 (0.96,1.11)                                     | 0.407   |
| Asthma since 2014             | 0.83 (0.63,1.09)                                    | 0.175   | 0.84 (0.70,1.01)                                     | 0.060   |
| COPD since 2014               | 0.93 (0.66,1.30)                                    | 0.652   | 1.01 (0.85,1.19)                                     | 0.944   |

Supplementary Table S5. Age stratified results for those aged 18-64 years - Multivariate model results for associations between respiratory outcomes and mine fire-related PM<sub>2.5</sub> concentrations.

| Outcomes                      | Mean 24-h exposure model<br>(10 µg/m <sup>3</sup> ) |         | Peak 12-h exposure model<br>(100 µg/m <sup>3</sup> ) |         |
|-------------------------------|-----------------------------------------------------|---------|------------------------------------------------------|---------|
|                               | Adj OR (95% CI)                                     | p-value | Adj OR (95% CI)                                      | p-value |
| Current wheeze                | 1.08 (0.98,1.20)                                    | 0.131   | 1.07 (1.02,1.13)                                     | 0.006   |
| Chest tightness               | 1.06 (0.96,1.16)                                    | 0.276   | 1.04 (0.98,1.09)                                     | 0.171   |
| Nocturnal shortness of breath | 1.04 (0.93,1.15)                                    | 0.530   | 1.03 (0.97,1.09)                                     | 0.350   |
| Resting shortness of breath   | 1.06 (0.95,1.18)                                    | 0.272   | 1.04 (0.98,1.10)                                     | 0.196   |
| Current nasal symptoms        | 1.05 (0.95,1.16)                                    | 0.303   | 1.03 (0.98,1.09)                                     | 0.211   |
| Chronic cough                 | 1.17 (1.04,1.30)                                    | 0.008   | 1.07 (1.02,1.14)                                     | 0.013   |
| Chronic Phlegm                | 1.14 (1.02,1.28)                                    | 0.023   | 1.04 (0.98,1.10)                                     | 0.203   |
| Asthma since 2014             | 1.11 (0.84,1.47)                                    | 0.464   | 1.10 (0.93,1.31)                                     | 0.279   |
| COPD since 2014               | 0.91 (0.64,1.28)                                    | 0.572   | 0.94 (0.76,1.16)                                     | 0.586   |

Supplementary Table S6. Age stratified results for those aged 65 years and over - Multivariate model results for associations between respiratory outcomes and mine fire-related PM<sub>2.5</sub> concentrations.

| Outcomes                      | Mean 24-h exposure model<br>(10 µg/m <sup>3</sup> ) |         | Peak 12-h exposure model<br>(100 µg/m <sup>3</sup> ) |         |
|-------------------------------|-----------------------------------------------------|---------|------------------------------------------------------|---------|
|                               | Adj OR (95% CI)                                     | p-value | Adj OR (95% CI)                                      | p-value |
| Current wheeze                | 0.94 (0.83,1.07)                                    | 0.377   | 1.02 (0.95,1.10)                                     | 0.504   |
| Chest tightness               | 0.97 (0.84,1.11)                                    | 0.640   | 1.01 (0.94,1.09)                                     | 0.794   |
| Nocturnal shortness of breath | 0.92 (0.81,1.06)                                    | 0.240   | 0.99 (0.92,1.06)                                     | 0.753   |
| Resting shortness of breath   | 0.90 (0.78,1.05)                                    | 0.181   | 0.99 (0.91,1.07)                                     | 0.797   |
| Current nasal symptoms        | 0.97 (0.88,1.08)                                    | 0.601   | 0.99 (0.93,1.05)                                     | 0.626   |
| Chronic cough                 | 1.04 (0.92,1.18)                                    | 0.510   | 1.04 (0.97,1.12)                                     | 0.241   |
| Chronic Phlegm                | 0.97 (0.83,1.14)                                    | 0.699   | 1.01 (0.93,1.11)                                     | 0.769   |
| Asthma since 2014             | 1.04 (0.72,1.50)                                    | 0.846   | 0.99 (0.81,1.22)                                     | 0.939   |
| COPD since 2014               | 0.79 (0.54,1.16)                                    | 0.227   | 0.98 (0.82,1.18)                                     | 0.829   |

Supplementary Table S7. Whole Population - Multivariate model results for associations between respiratory outcomes and a) Home building materials and b) Roofing materials.

| Outcomes                      | Material Type                       | Mean 24-h exposure model<br>(10 µg/m <sup>3</sup> ) |         | Peak 12-h exposure model<br>(100 µg/m <sup>3</sup> ) |         |
|-------------------------------|-------------------------------------|-----------------------------------------------------|---------|------------------------------------------------------|---------|
|                               |                                     | Adj OR (95% CI)                                     | p-value | Adj OR (95% CI)                                      | p-value |
| Current wheeze                | Home main material - brick/concrete | 0.74 (0.61,0.90)                                    | 0.002   | 0.75 (0.62,0.91)                                     | 0.004   |
|                               | Roof main material - tin/iron       | 0.93 (0.76,1.14)                                    | 0.474   | 0.94 (0.76,1.15)                                     | 0.523   |
| Chest tightness               | Home main material - brick/concrete | 0.83 (0.67,1.02)                                    | 0.082   | 0.84 (0.68,1.03)                                     | 0.089   |
|                               | Roof main material - tin/iron       | 1.09 (0.89,1.35)                                    | 0.396   | 1.10 (0.89,1.35)                                     | 0.372   |
| Nocturnal shortness of breath | Home main material - brick/concrete | 0.79 (0.63,0.99)                                    | 0.040   | 0.80 (0.63,1.00)                                     | 0.047   |
|                               | Roof main material - tin/iron       | 0.95 (0.76,1.20)                                    | 0.684   | 0.96 (0.76,1.20)                                     | 0.698   |
| Resting shortness of breath   | Home main material - brick/concrete | 0.74 (0.59,0.93)                                    | 0.010   | 0.75 (0.59,0.94)                                     | 0.012   |
|                               | Roof main material - tin/iron       | 1.00 (0.78,1.27)                                    | 0.979   | 1.00 (0.79,1.27)                                     | 1.000   |
| Current nasal symptoms        | Home main material - brick/concrete | 0.88 (0.73,1.05)                                    | 0.156   | 0.88 (0.73,1.05)                                     | 0.161   |
|                               | Roof main material - tin/iron       | 1.25 (1.04,1.50)                                    | 0.019   | 1.25 (1.04,1.51)                                     | 0.017   |
| Chronic cough                 | Home main material - brick/concrete | 0.79 (0.65,0.97)                                    | 0.021   | 0.79 (0.65,0.96)                                     | 0.016   |
|                               | Roof main material - tin/iron       | 1.12 (0.91,1.38)                                    | 0.284   | 1.13 (0.92,1.39)                                     | 0.236   |
| Chronic Phlegm                | Home main material - brick/concrete | 0.87 (0.70,1.08)                                    | 0.201   | 0.86 (0.69,1.06)                                     | 0.163   |
|                               | Roof main material - tin/iron       | 1.26 (1.01,1.57)                                    | 0.038   | 1.27 (1.02,1.59)                                     | 0.032   |
| Asthma since 2014             | Home main material - brick/concrete | 1.19 (0.58,2.41)                                    | 0.635   | 1.20 (0.59,2.42)                                     | 0.612   |
|                               | Roof main material - tin/iron       | 1.12 (0.53,2.37)                                    | 0.766   | 1.13 (0.53,2.40)                                     | 0.748   |
| COPD since 2014               | Home main material - brick/concrete | 1.16 (0.65,2.06)                                    | 0.613   | 1.19 (0.67,2.12)                                     | 0.555   |
|                               | Roof main material - tin/iron       | 1.27 (0.71,2.26)                                    | 0.423   | 1.23 (0.69,2.20)                                     | 0.488   |

Supplementary Table S8. Multivariate analysis results when a two-way interaction was fitted between mine fire PM<sub>2.5</sub> concentrations and housing material.

| Outcomes                      |             | Mean 24-h exposure model<br>(10 µg/m <sup>3</sup> ) |         | Peak 12-h exposure model<br>(100 µg/m <sup>3</sup> ) |         |
|-------------------------------|-------------|-----------------------------------------------------|---------|------------------------------------------------------|---------|
|                               |             | Adj OR (95% CI)                                     | p-value | Adj OR (95% CI)                                      | p-value |
| Current wheeze                | Main effect | 1.10 (0.97,1.25)                                    | 0.132   | 1.09 (1.02,1.16)                                     | 0.011   |
|                               | Interaction | 0.90 (0.76,1.05)                                    | 0.185   | 0.96 (0.88,1.04)                                     | 0.338   |
| Chest tightness               | Main effect | 1.10 (0.97,1.24)                                    | 0.126   | 1.06 (0.99,1.14)                                     | 0.076   |
|                               | Interaction | 0.90 (0.76,1.06)                                    | 0.208   | 0.95 (0.87,1.04)                                     | 0.293   |
| Nocturnal shortness of breath | Main effect | 1.13 (0.99,1.28)                                    | 0.062   | 1.06 (0.99,1.14)                                     | 0.114   |
|                               | Interaction | 0.81 (0.68,0.97)                                    | 0.025   | 0.94 (0.85,1.03)                                     | 0.202   |
| Resting shortness of breath   | Main effect | 1.15 (1.01,1.30)                                    | 0.036   | 1.08 (1.00,1.16)                                     | 0.039   |
|                               | Interaction | 0.80 (0.66,0.96)                                    | 0.015   | 0.92 (0.83,1.01)                                     | 0.077   |
| Current nasal symptoms        | Main effect | 1.07 (0.95,1.21)                                    | 0.253   | 1.04 (0.98,1.12)                                     | 0.203   |
|                               | Interaction | 0.93 (0.80,1.08)                                    | 0.329   | 0.96 (0.89,1.05)                                     | 0.383   |
| Chronic cough                 | Main effect | 1.10 (0.96,1.26)                                    | 0.178   | 1.07 (1.00,1.15)                                     | 0.056   |
|                               | Interaction | 1.05 (0.88,1.25)                                    | 0.605   | 0.99 (0.91,1.09)                                     | 0.873   |
| Chronic Phlegm                | Main effect | 1.09 (0.96,1.24)                                    | 0.166   | 1.04 (0.97,1.11)                                     | 0.258   |
|                               | Interaction | 1.00 (0.84,1.21)                                    | 0.964   | 0.99 (0.90,1.10)                                     | 0.908   |
| Asthma since 2014             | Main effect | 0.97 (0.71,1.34)                                    | 0.858   | 1.05 (0.79,1.39)                                     | 0.753   |
|                               | Interaction | 1.17 (0.77,1.79)                                    | 0.465   | 1.04 (0.76,1.44)                                     | 0.791   |
| COPD since 2014               | Main effect | 0.92 (0.63,1.32)                                    | 0.641   | 0.97 (0.78,1.19)                                     | 0.763   |
|                               | Interaction | 0.86 (0.51,1.46)                                    | 0.579   | 0.98 (0.74,1.31)                                     | 0.916   |

Note: The reported Interaction result reflects the association between respiratory outcomes and the two-way interaction variable (PM<sub>2.5</sub> and housing material).

The reported Main effect result reflects the association between respiratory outcomes and mine fire PM<sub>2.5</sub> concentrations for participants with non-brick/concrete building materials.

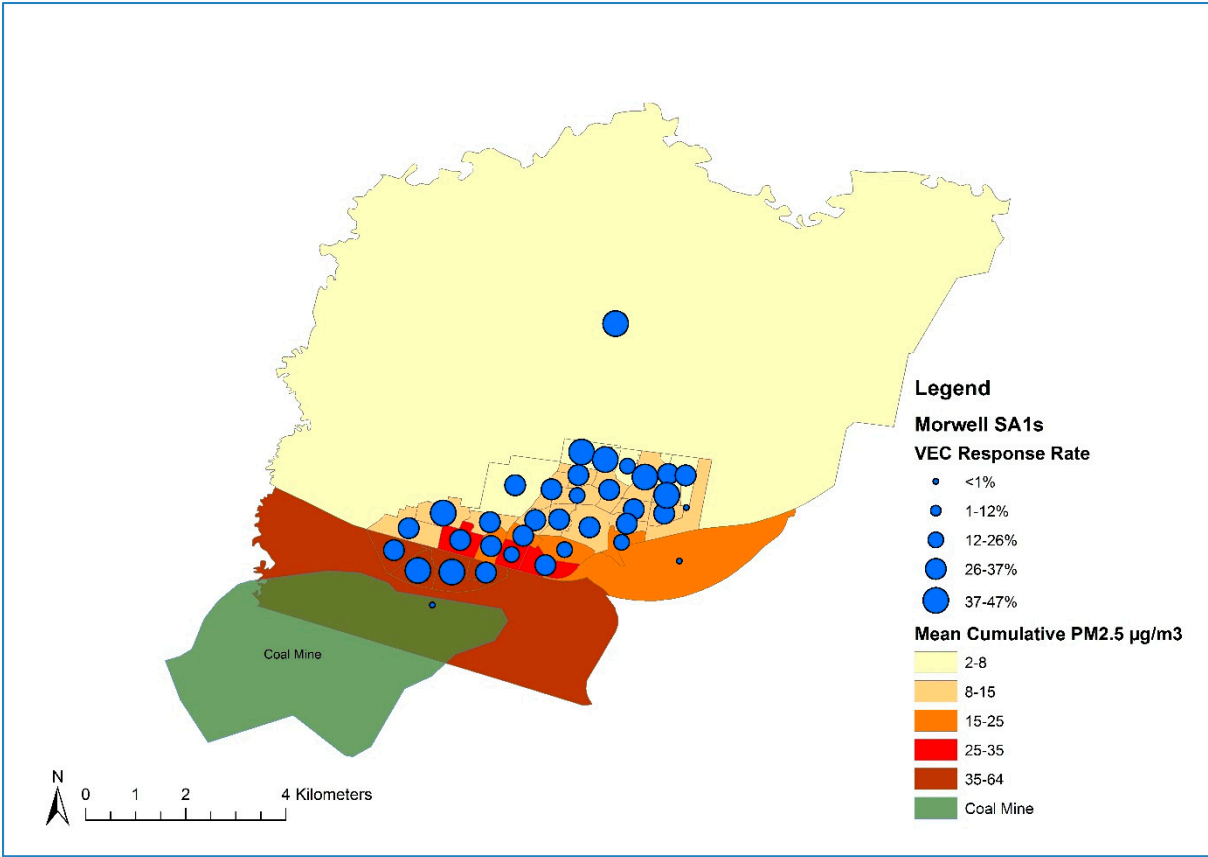

Supplementary Figure S1. Morwell Adult Survey VEC participation rates by SA1, mapped on mean cumulative 24-h mine fire-related PM<sub>2.5</sub> concentrations, for the period 9 February – 31 March 2014.

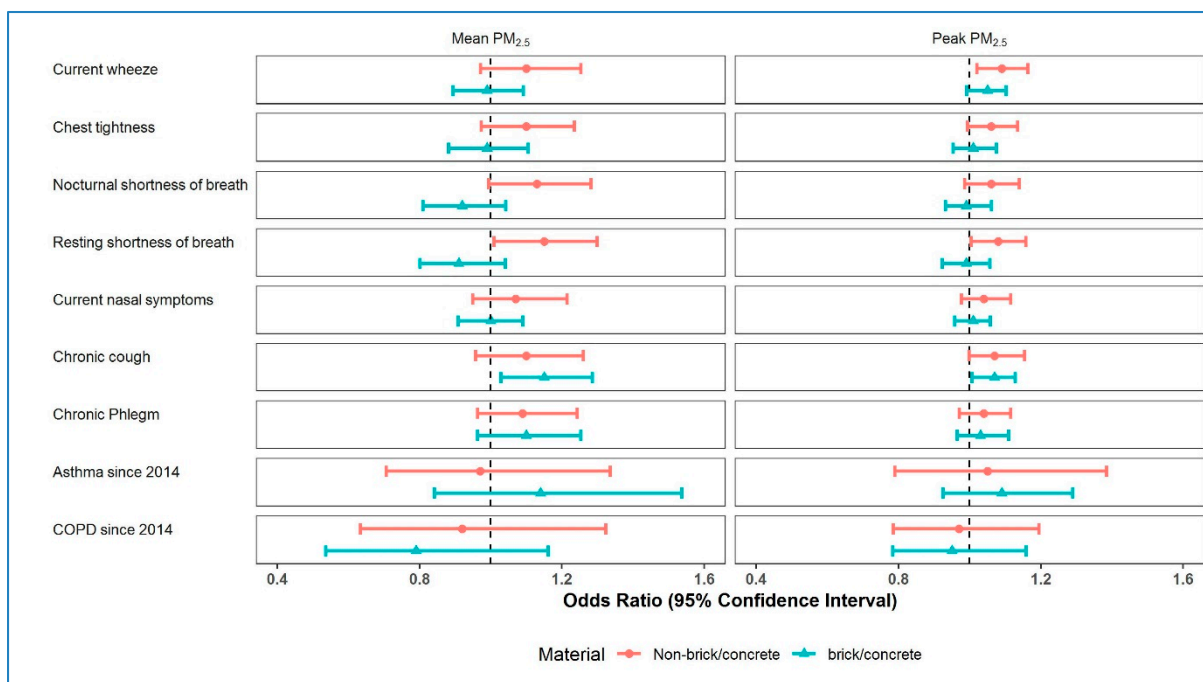

Supplementary Figure S2. Multivariate analysis results of the associations between mine fire-related PM<sub>2.5</sub> concentrations and respiratory outcomes stratified by housing material, when a variable is included for the interaction between PM<sub>2.5</sub> concentrations and housing building materials.
